# Supplementary material for: Facile assembly of silica gel/reduced graphene oxide/Ag nanoparticle composite with a core–shell structure and its excellent catalytic properties
Source: Royal Society of Chemistry journal article supplement (doi:10.1039/c3ta14307d), 2013-11-22
Supplement: c3ta14307d.pdf [file c3ta14307d.pdf]

ARTICLE

## Supporting information

# Facile Assembly of Silica Gel/Reduced Graphene Oxide/Ag Nanoparticle Composite with a Core–Shell Structure and its Excellent Catalytic Properties

Taiyang Zhang,<sup>a</sup> Xiangqing Li,<sup>\*a</sup> Shi-Zhao Kang,<sup>a</sup> Lixia Qin,<sup>a</sup> Guodong Li<sup>b</sup> and Jin Mu<sup>\*a</sup>

<sup>a</sup> School of Chemical and Environmental Engineering, Shanghai Institute of Technology, 100 Haiquan Road, Shanghai 201418, China.

<sup>b</sup> State Key Laboratory of Inorganic Synthesis Preparative Chemistry, College of Chemistry, Jilin University, Changchun 130012, China.

\* E-mail: xqli@sit.edu.cn (X. Li); mujin@sit.edu.cn (J. Mu)

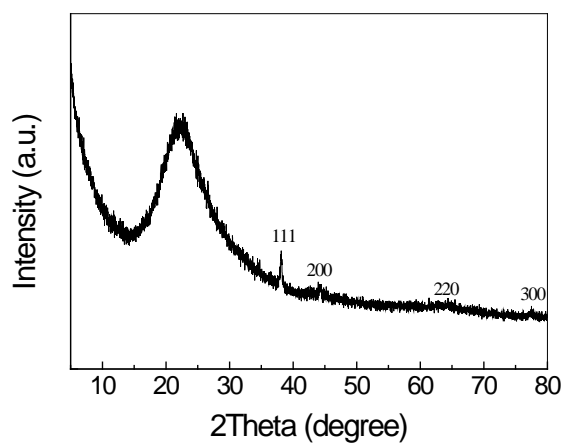

Fig. S1 XRD pattern of the SG/RGO/Ag after being recycled for six recycles

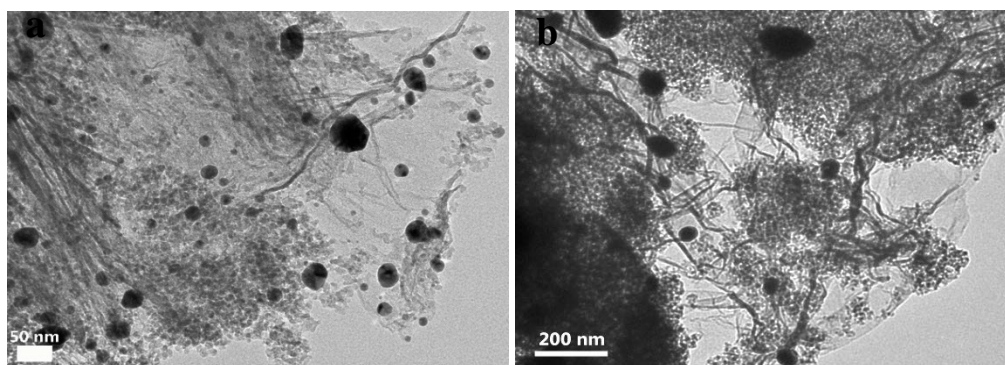

Fig. S2 TEM images of the SG/RGO/Ag assembly. (a) before recycle and (b) after six recycles
